# Supplementary material
Source: publisher site journal article supplement (https://www.dovepress.com/article/359611)
Supplement: Supplementary file 1 [file get_supplementary_file.php]

**Supplementary File**

**Sampling Method**

In the first stage, we recorded the physical examination centers in tertiary care hospitals with more than 200 organizations, institutions, or companies registered for health screening per year, and then randomly selected two to three medical examination centers via systematic sampling. In the second stage, we selected the registered organizations, institutions, and companies with stable employees and categorized them by occupation (white collar, pink collar, and blue collar) for each selected medical examination center. We then proportionally selected 100–200 registered organizations, institutions, and companies for each occupation category. Individuals of those selected organizations, institutions, and companies who were aged 18 years or older and voluntarily participated in the survey and signed the informed consent were included. Individuals who were pregnant, had serious physical and mental illnesses, or were in a state of physical infection such as fever or diarrhea were excluded. Individuals were additionally excluded from the current analyses if they 1) aged 65 years or older; 2) were ever diagnosed with cardiovascular diseases or stroke; 3) were taking lipid-lowering agents.

**Definitions of lifestyle factors**

We collect lifestyle factors, including smoking, alcohol drinking, physical exercise, and sedentary behaviour. Participants who reported had been smoking for more than half a year were defined as smokers. In contrast, those who reported having smoked but later quit for a sustained period of a half year or longer by the time of the interview were former smokers. Participants who consumed alcohol at least once a week were defined as alcohol drinkers. Those who had quit drinking alcohol for a sustained period of a half year or longer by the time of the interview were drinking abstainers. Sitting or reclining longer than 6 hours per day while awake was defined as being sedentary. Physical exercise was defined as an exercise once a week or more and for at least half an hour each time.
